# Supplementary material for: Evolution and development of complex floral displays
Source: PubMed Central journal article supplement (PMC11574353; doi:10.1242/dev.203027), 2024-11-05
Supplement: develop-151-203027-s1.pdf [file develop-151-203027-s1.pdf]

**Table S1.** List of species discussed in the Review, detailing which section they are mentioned in. These species are categorized as exhibiting simple or more elaborate complexity, according to whether one or more of the developmental modules discussed in this Review are modified. A summary of which of the four modules is modified to produce the observed morphological diversity is included for each species. Abbreviations: I, inflorescence architecture; C, flower colour; O, organ identity; S, flower symmetry.

| Species                      | Order        | Family         | Level of complexity | Modules of complexity |
|------------------------------|--------------|----------------|---------------------|-----------------------|
| <i>Antirrhinum majus</i>     | Lamiales     | Plantaginaceae | Simple              | C                     |
| <i>Amorphophallus</i>        | Alismatales  | Araceae        | Elaborate           | I, O, C               |
| <i>Anthriscus sylvestris</i> | Apiales      | Apiaceae       | Elaborate           | I, S                  |
| <i>Apium graveolens</i>      | Apiales      | Apiaceae       | Simple              | I                     |
| <i>Aquilegia caerulea</i>    | Ranunculales | Ranunculaceae  | Elaborate           | O, C                  |
| <i>Arabidopsis thaliana</i>  | Brassicales  | Brassicaceae   | Simple              | I                     |
| <i>Asclepias syriaca</i>     | Gentianales  | Apocynaceae    | Elaborate           | I, O                  |
| <i>Chirita</i>               | Lamiales     | Gesneriaceae   | Elaborate           | S, C                  |
| <i>Chrysanthemum</i>         | Asterales    | Asteraceae     | Elaborate           | I, C                  |
| <i>Clarkia gracilis</i>      | Myrtales     | Onagraceae     | Simple              | C                     |
| <i>Cornus</i>                | Cornales     | Cornaceae      | Elaborate           | I, O                  |
| <i>Daucus carota</i>         | Apiales      | Apiaceae       | Simple              | I                     |
| <i>Davidia</i>               | Cornales     | Nyssaceae      | Elaborate           | I, O                  |
| <i>Dietes robinsoniana</i>   | Asparagales  | Iridaceae      | Simple              | O                     |
| <i>Euphorbia rigida</i>      | Malpighiales | Euphorbiaceae  | Elaborate           | I, O, S               |
| <i>Gerbera hybrida</i>       | Asterales    | Asteraceae     | Elaborate           | I, S, C               |
| <i>Gorteria diffusa</i>      | Asterales    | Asteraceae     | Elaborate           | I, O, S, C            |
| <i>Helianthus annuus</i>     | Asterales    | Asteraceae     | Elaborate           | I, S, C               |
| <i>Helleborus orientalis</i> | Ranunculales | Ranunculaceae  | Elaborate           | O, C                  |
| <i>Hibiscus trionum</i>      | Malvales     | Malvaceae      | Simple              | C                     |
| <i>Hydrangea</i>             | Cornales     | Hydrangeaceae  | Elaborate           | I, O, C               |
| <i>Impatiens</i>             | Ericales     | Balsaminaceae  | Elaborate           | I, O, C               |
| <i>Knautia macedonica</i>    | Dipsacales   | Caprifoliaceae | Elaborate           | I, S                  |
| <i>Linaria spartea</i>       | Lamiales     | Plantaginaceae | Elaborate           | O, S                  |
| <i>Mandragora caulescens</i> | Solanales    | Solanaceae     | Simple              | S                     |
| <i>Marcgravia</i>            | Ericales     | Marcgraviaceae | Elaborate           | I, O                  |
| <i>Meconopsis grandis</i>    | Ranunculales | Papaveraceae   | Elaborate           | O, C                  |
| <i>Mimulus lewisii</i>       | Lamiales     | Phrymaceae     | Simple              | C                     |
| <i>Myosotis arvenis</i>      | Boraginales  | Boraginaceae   | Elaborate           | I, C                  |
| <i>Leucadendron discolor</i> | Proteales    | Proteaceae     | Elaborate           | I, O, C               |
| <i>Narcissus</i>             | Asparagales  | Amaryllidaceae | Elaborate           | O, C                  |
| <i>Nicotiana obtusifolia</i> | Solanales    | Solanaceae     | Simple              | I                     |
| <i>Nigella</i>               | Ranunculales | Ranunculaceae  | Elaborate           | O, C                  |
| <i>Ophrys</i>                | Asparagales  | Orchidaceae    | Elaborate           | O, C, S               |
| <i>Oryza sativa</i>          | Poales       | Poaceae        | Elaborate           | I, O                  |
| <i>Passiflora caerulea</i>   | Malpighiales | Passifloraceae | Elaborate           | O, S, C               |

|                                  |                |                 |           |            |
|----------------------------------|----------------|-----------------|-----------|------------|
| <i>Petrea volubilis</i>          | Lamiales       | Verbenaceae     | Elaborate | O, S       |
| <i>Petunia hybrida</i>           | Solanales      | Solanaceae      | Elaborate | I, S, C    |
| <i>Pholidota imbricata</i>       | Asparagales    | Orchidaceae     | Simple    | S          |
| <i>Schizanthus pinnatus</i>      | Solanales      | Solanaceae      | Elaborate | I, S, O, C |
| <i>Senecio vulgaris</i>          | Asterales      | Asteraceae      | Elaborate | I, S       |
| <i>Silene latifolia</i>          | Caryophyllales | Caryophyllaceae | Elaborate | I, O       |
| <i>Syringa vulgaris</i>          | Lamiales       | Oleaceae        | Simple    | I          |
| <i>Tagetes erecta</i>            | Asterales      | Asteraceae      | Elaborate | I, S, C    |
| <i>Tulipa spp.</i>               | Liliales       | Liliaceae       | Simple    | O          |
| <i>Veronica<br/>gentianoides</i> | Lamiales       | Plantaginaceae  | Elaborate | O, S, C    |

---
